1 **Designed Variants of ACE2-Fc that Decouple Anti-SARS-CoV-2 Activities from Unwanted**  
2 **Cardiovascular Effects**

3 Pan Liu<sup>a</sup>, Xinfang Xie<sup>a,b</sup>, Li Gao<sup>a,b</sup>, and Jing Jin<sup>a\*</sup>

4

5 <sup>a</sup>Feinberg Cardiovascular and Renal Research Institute, Department of Medicine-Nephrology and  
6 Hypertension, Northwestern University Feinberg School of Medicine, Chicago, IL, USA

7 <sup>b</sup>Department of Nephrology, The First Affiliated Hospital of Medical College, Xi'an Jiaotong University,  
8 Xi'an, China

9

10 \*Correspondence to: Jing Jin, 303 E. Superior Street, Room 8-518, Chicago, IL 60611, Tel. 312-503-8190,  
11 Email: [jing.jin@northwestern.edu](mailto:jing.jin@northwestern.edu)

12

13

14

15

16

17        **Abstract**

18        Angiotensin-converting enzyme 2 (ACE2) is the entry receptor for SARS-CoV-2, and recombinant ACE2  
19        decoys are being evaluated as new antiviral therapies. We designed and tested an antibody-like ACE2-Fc  
20        fusion protein, which has the benefit of long pharmacological half-life and the potential to facilitate immune  
21        clearance of the virus. Out of a concern that the intrinsic catalytic activity of ACE2 may unintentionally alter  
22        the balance of its hormonal substrates and cause adverse cardiovascular effects in treatment, we performed  
23        a mutagenesis screening for inactivating the enzyme. Three mutants, R273A, H378A and E402A, completely  
24        lost their enzymatic activity for either surrogate or physiological substrates. All of them remained capable of  
25        binding SARS-CoV-2 and could suppress the transduction of a pseudotyped virus in cell culture. This study  
26        established new ACE2-Fc candidates as antiviral treatment for SARS-CoV-2 without potentially harmful side  
27        effects from ACE2's catalytic actions toward its vasoactive substrates.

28        **Key words:**

29        ACE2-Fc; SARS-CoV-2; COVID-19; Mutagenesis.

30

## 31 1. Introduction

32 As COVID-19 pandemic is still unfolding and no specific antiviral treatments are available, there is an  
33 unmet need to explore new drug candidates that are effective and safe, and broad spectrum against the  
34 evolving virus. In addition to the ongoing clinical trials of repurposed compounds and patient-derived  
35 antibodies, new drugs are being developed through targeted screening and rational design.

36 One of the focuses is on drug candidates that target receptor-mediated viral entry. A diverse group of  
37 human coronaviruses including SARS-CoV of 2002, HCoV-NL63 of 2004 and SARS-CoV-2 of COVID-19 rely on  
38 their spike proteins to bind ACE2 cell receptor as the first step in viral entry[1-4]. It has been shown that  
39 soluble ACE2 at generous abundance as compared to viral concentration can lower infectivity of cultured  
40 human cells, similar to experimental anti-spike antibodies[5-7]. Prior to the pandemic, one of the human  
41 recombinant soluble ACE2 (hrsACE2) drugs developed by Apeiron Biologics and GlaxoSmithKline (GSK) had  
42 completed Phase I and Phase II clinical trials for human pulmonary arterial hypertension and acute  
43 respiratory distress syndrome (ARDS) [8, 9], and is now repositioned for investigational treatment of COVID-  
44 19 (ClinicalTrials.gov identifier: NCT04335136).

45 The current focus has been on improving binding affinity, pharmacokinetic/pharmacodynamic (PK/PD),  
46 antiviral specificity and neutralization efficacy of ACE2-based biologics through bioengineering design[6, 10-  
47 12]. Also in a different context unrelated to COVID-19, our group had previously constructed a chimeric  
48 fusion between the ectodomain of ACE2 and the Fc segment of IgG1 (“hinge” plus CH2 and CH3 regions)  
49 (**Fig1A**). In keeping with a well-recognized function of Fc to extend protein half-life through its cognate  
50 neonatal Fc receptor (FcRn), ACE2-Fc has improved pharmacokinetics as compared to untagged soluble  
51 ACE2[13]. The enzymatic activity of ACE2 in the fusion degraded angiotensin II (AngII) and rendered blood  
52 pressure control for up to two weeks. In comparison to its untagged counterpart to treat COVID-19, ACE2-Fc  
53 is predicted to offer superior pharmacological benefits, which make it also suitable for prophylactic usages  
54 by frontline healthcare workers and caregivers[11].

55 Our study attempts to address another potential drawback of hrsACE2 biologic. Although it was originally  
56 believed that the catalytic activity of ACE2 delivered in an excess quantity through therapeutic hrsACE2 may  
57 alleviate ARDS based on mouse studies[8, 14], the relevance in human disease remains unclear. COVID-19  
58 mortality is prevalent among patients with underlying conditions such as cardiovascular disease, diabetes  
59 and chronic lung disease [15-18], a large number of COVID-19 patients are on existing ACEI/ARB blockade  
60 therapy for preexisting cardiovascular and diabetic comorbidities[19]. There have been different opinions on

61 whether RAAS blockade medications had improved or worsened COVID-19 recovery[20-24]. However,  
62 studies discovered a correlation between RAAS blockade and upregulation of endogenous ACE2 expression,  
63 causing concern of increased risk of SARS-CoV-2 infection[25-29]. The carboxypeptidase activity of  
64 therapeutic hrsACE2 hydrolyses a broad range of vasoactive hormonal substrates including AngII, apelin-13,  
65 bradykinin, among others, and exerts systemic RAAS blockade that affects the heart, the blood vessels, the  
66 kidney and the lung. Severe cases of SARS-CoV-2 infection frequently have multiorgan involvement [30-34].  
67 In our view, the dual functions of investigational drug hrsACE2 to simultaneously act on viral neutralization  
68 and RAAS can potentially complicate clinical assessment of therapeutic efficacy. In order to achieve an  
69 exclusive antiviral function in an ACE2-derived biologic, we sought to modify ACE2 catalytic center to limit  
70 the catalysis of its vasoactive substrates.

## 71 **2. Materials and Methods**

### 72 **2.1. Construction of ACE2-Fc mutant plasmids**

73 DNA sequence encoding the ectodomain of human ACE2 (aa 1-740) was cloned from a human kidney  
74 cDNA library. DNA encoding human Fc of IgG1 has been described previously[13]. An in-frame fusion  
75 between ACE2 and Fc was constructed in pcDNA3 vector (Invitrogen, Carlsbad, CA). Site-directed  
76 mutagenesis by PCR was performed to create the panel of ACE2-Fc mutants. All mutants were confirmed by  
77 sequencing.

### 78 **2.2. Recombinant protein expression and purification**

79 The workflow for generating recombinant ACE2-Fc variants was similar to what had been reported  
80 before[13]. Briefly, HEK293 cells were transfected with individual ACE2-Fc variants by standard  
81 polyethylenimine (PEI) method. In transgene transfection studies, on day two of transfection cells were  
82 switched to serum-free DMEM. On day four, the culture media were harvested by centrifugation, and  
83 further concentrated using Amico Ultra Filters (Millipore, Billerica, MA). ACE2-Fc proteins were then purified  
84 by size-exclusion chromatography (SEC) using Superdex 200 Increase column (GE healthcare, Chicago, IL)  
85 and stored at -80°C until used in experiments.

86  $\Delta$ ACE2-Fc Arg273Ala, His378Ala and Glu402Ala, and wild-type ACE2-Fc selected for scaled production  
87 were produced from clonal stable-expressing cells. The general method was described previously[13].  
88 Following plasmid transfection of HEK293 cells, the cells were selected under 1 mg/mL G418 (Thermo Fisher  
89 Scientific, Waltham, MA) for ~14 days until isolated cell colonies appeared in the dishes. Individual cell  
90 clones were seeded into 96-well plates. When cells reached 50-100% density in the wells, the culture media

91 were tested for their ACE2-Fc contents using a custom ELISA (anti-ACE2 antibody [Abcam, Cambridge, MA]  
92 for capturing and anti-human IgG-Fc-HRP [SouthernBiotech, Birmingham, AL] for detection). Clones with the  
93 highest expression of recombinant ACE2-Fc variants were selected, and individually expanded to five 150  
94 mm dishes. Once reached ~90% confluency, the cultures were switched to serum-free DMEM medium. After  
95 4-5 days the culture media were harvested, and further concentrated using a VIVAFLOW 200 filtration  
96 system (100,000 MWCO by Sartorius, Stonehouse, UK). Recombinant ACE2-Fc proteins were purified using  
97 SEC as described above.

### 98 **2.3. ACE2 peptidase activity measured using surrogate Mca-APK(Dnp)**

99 ACE2-Fc peptidase activity assay using surrogate fluorogenic substrate Mca-APK(Dnp) (Enzo Life Sciences,  
100 Farmingdale, NY) was performed in black microtiter plates. The reaction buffer contained 50 mM 4-  
101 morpholineethanesulfonic acid, pH=6.5, 300 mM NaCl, 10 μM ZnCl<sub>2</sub>, 0.01% Triton X-100 and 20 μM of  
102 Mca-APK(Dnp). The total reaction volume was 100 μL at room temperature and the duration of the  
103 reactions were 20 min. Peptidase activities were calculated as fluorescence intensity at 320 nm excitation  
104 and 420 nm emission wavelength.

### 105 **2.4. ACE2 peptidase activity measured using physiological substrates of AngII and apelin-13**

106 We described the method previously and referred to the workflow as Phenylalanine Assay, which was  
107 tested using AngII and apelin-13 as substrates in reactions with ACE2[35]. It involves two coupled reactions,  
108 hydrolysis of the C-terminus phenylalanine residues from the substrates by ACE2 catalysis and the  
109 measurement of free amino acid phenylalanine using yeast enzyme of phenylalanine ammonia lyase (PAL) in  
110 a colorimetric assay (supplementary Figure S2).

111 The reactions were carried out using indicated concentrations of ACE2-Fc proteins together with either  
112 AngII or apelin-13 at indicated concentrations in reaction buffer containing 20 mM Tris-HCl, pH=7.4,  
113 136 mM NaCl and 10 μM ZnCl<sub>2</sub>. The first reaction was proceeded at 37°C after 20 min before stopped by  
114 80°C heat inactivation for 5 min. The second reaction used a phenylalanine detection kit (Sigma-Aldrich, St.  
115 Louis, MO). 1 μL enzyme mix and 1 μL developer from the kit were added to the above reaction, which was  
116 allowed to proceed for 20 min at room temperature. Fluorescence intensity was measured at 535 nm  
117 excitation and 585 nm emission wavelength, and all reactions were performed in triplicate.

### 118 **2.5. SARS-CoV-2 RBD binding assay**

119 Recombinant viral RBD protein was purchased from Sino Biological (Beijing, China). ELISA wells were  
120 precoated with either PBS as controls or 100 ng/well of RBD protein. Serial concentrations of individual  
121 ACE2-Fc variants were added to the wells. After overnight incubation at 4°C, the wells were washed three  
122 times with TBST buffer before HRP-conjugated anti-human IgG-Fc secondary antibody was added. HRP  
123 reactions were developed with TMB substrate and the binding strength derived from OD450 (nm) readings  
124 of the reactions. The EC50 values were determined by log(agonist) vs. response nonlinear regression fit  
125 analysis (GraphPad Prism).

## 126 **2.6. Inhibition of viral transduction with purified $\Delta$ ACE2-Fc mutants**

127 Spike (SARS-CoV-2) pseudotyped lentivirus with luciferase reporter gene was purchased from BPS  
128 Bioscience (San Diego, CA). The virus was used to transduce HEK293 with stable expression of receptor full-  
129 length ACE2. The stable cell line was created from plasmid expressing full-length human ACE2 in pcDNA3  
130 vector. Followed a similar procedure for generating ACE2-Fc clones, stable HEK293 clones with receptor  
131 ACE2 expression was identified using immune detection of ACE2 in the cells. The ACE2-HEK293 cells were  
132 seeded at a density of 10,000 cells per well into white 96-well cell culture microplate one day before  
133 transduction. To test inhibition of viral transduction, 5  $\mu$ L pseudotyped lentivirus were preincubated with 5  
134  $\mu$ L vehicle or serially diluted ACE2-Fc variants at 37 °C for 1 h and then added into the cells. After overnight  
135 incubation, the cells were refed with fresh medium and incubated for another 36 hours. Luciferase activity  
136 was measured using ONE-Glo™ Luciferase Assay System according to the manufacture's protocol (Promega,  
137 Madison, WI). The IC50 values were determined by log(inhibitor) vs. response nonlinear regression fit  
138 analysis (GraphPad Prism).

## 139 **2.7. ACE2-Fc pharmacokinetics in mice**

140 Institutional Animal Care and Use Committee of the Northwestern University approved the animal  
141 procedure in this study (approved protocol number IS00009990). The general method for pharmacokinetic  
142 measurements were described previously[13]. Briefly, a bolus intravenous injection of ACE2-Fc proteins  
143 (0.5mg/kg body weight) was performed in 10 weeks old female BALB/c mice. Subsequently, serial blood  
144 samples were collected from tail bleeding at indicated time points. Collected blood samples were left  
145 undisturbed on ice, and sera were isolated by centrifugation at 6000 x g for 10 minutes at 4°C. The levels of  
146 ACE2-Fc in the sera were measured by ELISA using anti-ACE2 capturing antibody and anti-human IgG-Fc-HRP  
147 antibody for detection as described above.

## 148 **3. Results**

### 149 **3.1. ACE2-Fc mutagenesis strategy to remove catalytic activity**

150 We constructed an ACE2-Fc template by using the ectodomain of ACE2 fused with an Fc sequence  
151 (**Fig1A**). The chimeric fusion naturally formed a dimer of >250 kDa as expected (**Fig1B**). There is an extensive  
152 amount of information with regard to the structural characteristics of ACE2 in relationship to SARS-CoV-2  
153 receptor-binding domain (RBD)[1, 2, 36-39]. SARS-CoV-2 binds a surface segment of ACE2 through the apex  
154 of its spike protein (**Fig1C**). ACE2 is a metallopeptidase that requires divalent cation such as zinc for activity.  
155 A Zn<sup>2+</sup> ion is buried deep in the catalytic cleft within the proximal lobe relative to the viral binding site. Based  
156 on an inhibitor-bound structure of ACE2[40], both proximal and distal residues that line the catalytic cleft  
157 form interactions with the inhibitor, which occupies the presumed substrate pocket (**Fig1D**). Zn<sup>2+</sup> is  
158 coordinated by three residues, His374, His378 and Glu402, which are the obvious choices for mutagenesis  
159 when making enzymatically inactive mutants[6] (**Fig1E**). In addition to these Zn<sup>2+</sup>-binding sites, we sought to  
160 look for catalytic residues in contact with the substrates that are further away from RBD binding segment.  
161 The inhibitor-bound structure indicates six residues that extend their side chains toward the substrate  
162 direction. These are Glu145, Arg273, His345, Pro346, Asp368 and His505 (**Fig1F**).

### 163 **3.2. Substrate-dependent inactivation among ACE2-Fc mutants**

164 Next, we made alanine-substitution of each residue including the three that bind Zn<sup>2+</sup> and the additional  
165 six that potentially bind substrates (supplementary figure S1). Wild-type and 9 mutants of ACE2-Fc were  
166 produced using a HEK293 expression system as soluble proteins (**Fig1B**). Purified proteins were subjected to  
167 a set of enzymatic assays using a surrogate Mca-APK(Dnp) fluorogenic substrate and physiological substrates  
168 such as AngII and apelin-13 (**Fig2**). It should be noted that although the surrogate substrate Mca-APK(Dnp) is  
169 traditionally used for measuring ACE2 activity, the sequence does not resemble those of the physiological  
170 substrates, which share a Pro-Phe motif at their C-termini (Supplementary figure S2). Instead, the catalysis  
171 of AngII and apelin-13 by ACE2-Fc variants was measured by the hydrolysis rate of their C-terminus Phe  
172 amino acid[35].

173 We performed Mca-APK(Dnp) measurements, alongside phenylalanine hydrolysis assays using AngII and  
174 apelin-13 as substrates to determine the enzymatic activities of the ACE2-Fc variants (**Fig2A-C**). In order to  
175 better characterize the catalytic performances of individual ACE2-Fc mutants relative to their wild-type  
176 counterpart, we conducted two types of enzymatic assays. The first method used an excess amount of the  
177 enzyme (100 ng) in reactions with varying concentrations of the three substrates. This would potentially

178 detect low partial activity of enzymes. The second method had a lower amount of purified ACE2-Fc variants  
179 (10 ng each) to react with an excess quantity of the substrates (2 or 10 nmol: see Methods) in order to  
180 distinguish among mutants with high activities. As it turned out, the results from these two methods were to  
181 an extend in agreement with each other (**Fig2**: left panels compared to right panels). One of the surprising  
182 findings was that there was a clear evidence of substrate-dependent inactivation of individual mutations,  
183 particularly among those lining the inhibitor/substrate space. For instance, while Mca-APK(Dnp) showed no  
184 activity of 7 ACE2-Fc mutants, including 4 substrate-binding residues of Arg273Ala, His345Ala, Pro346Ala  
185 and His505Ala (**Fig2A**), His345Ala, Pro346Ala and His505Ala remained active toward AngII and apelin-13  
186 (**Fig2B,2C**). In addition, His374Ala, one of the Zn<sup>2+</sup>-binding residues, retained a low level of activity against  
187 Apelin-13 (**Fig2C**). When all three substrates are considered, Arg273Ala, His378Ala and Glu402Ala were  
188 completely lack of peptidase activity. We referred these three mutants to as  $\Delta$ ACE2-Fc ( $\Delta$ : loss-of-activity)  
189 and considered them as candidate variants emerged from the screen.

### 190 **3.3. Binding affinities of individual ACE2-Fc mutants to SARS-CoV-2 receptor-binding domain**

191 Next, we performed binding assays using individual variants against purified spike RBD protein. As  
192 expected, all mutants displayed similar levels of binding to viral RBD, considering the relatively minor  
193 changes from the point mutations made to ACE2-Fc (**Fig3**). Overall, the wild-type protein showed the highest  
194 binding affinity, whereas all three Zn<sup>2+</sup>-binding site mutants, His374Ala, His378Ala and Glu402Ala, had the  
195 lowest affinities to RBD. This is consistent with the expectation that the ion pocket is in proximity to the viral  
196 binding site on ACE2 (**Fig1C**), and also that changing ion-binding can potentially induce structural instability  
197 of the protein. In contrast, Arg273Ala mutant of the substrate-binding pocket, which showed complete loss-  
198 of-activity towards all three substrates, is situated on the distal lobe and is less likely to affect desired viral  
199 binding.

### 200 **3.4. Competitive inhibition of pseudotyped viral transduction by R273A, H378A and E402A mutants of** 201 **$\Delta$ ACE2-Fc**

202  $\Delta$ ACE2-Fc Arg273Ala, His378Ala and Glu402Ala, and wild-type ACE2-Fc proteins were further tested for  
203 their antiviral potency. We conducted a series of viral inhibition assays using a pseudotyped reporter virus  
204 decorated with SARS-CoV-2 spike protein. The virus was able to transduce HEK293 cells that express full-  
205 length receptor ACE2 (See Methods). Each of the four ACE2-Fc variants in a range of concentrations was  
206 added to culture medium to test the potential of viral inhibition. As expected, all variants showed similar  
207 levels of efficacy to block pseudoviral transduction (**Fig4A**), with wild-type ACE2-Fc had a leading IC<sub>50</sub> of 0.13



208  $\mu\text{g/mL}$ , followed by His378Ala, Arg273Ala and Glu402Ala with their  $\text{IC}_{50\text{s}}$  of 0.16  $\mu\text{g/mL}$ , 0.19  $\mu\text{g/mL}$  and 0.25  
209  $\mu\text{g/mL}$ , respectively (**Fig4B**).

### 210 **3.5. Pharmacokinetics of lead $\Delta\text{ACE2}$ -Fc proteins**

211 We have previously shown the in vivo longevity of mouse ACE2-Fc, as well as the fact that mouse FcRn  
212 recognizes human Fc[13]. Here we intravenously injected the ACE2-Fc variants in mice and measured  
213 pharmacokinetics of biologics. All three  $\Delta\text{ACE2}$ -Fc and their wild-type control exhibited long half-lives in the  
214 range between 52.61 hrs and 69.88 hrs (**Fig5**), consistent with the expectation for Fc-fusion proteins.

## 215 **4. Discussions**

216 Our study followed a design strategy of screening for ACE2-Fc variants of having an exclusive SARS-CoV-2  
217 affinity with the absence of enzymatic activity towards vasoactive substrates. Based on the structure of  
218 ACE2's catalytic center, we selected a total of 9 residues to be individually replaced with alanine. These  
219 included 3 residues with their side chains binding to divalent cation and 6 residues that line the substrate  
220 pocket. We used a surrogate fluorogenic substrate as well as two physiological substrates of ACE2 in  
221 reactions and discovered an unexpected substrate-dependent inactivation among individual mutants of  
222 ACE2-Fc. The screening identified three loss-of-activity variants ( $\Delta\text{ACE2}$ -Fc), one with a mutation of  
223 substrate-binding site and two others having impairment of cation-binding. All three lead candidates  
224 maintained their binding capacity towards SARS-CoV-2 spike protein and inhibited the transduction of a  
225 pseudotyped reporter virus.

226 Although we focused on inactivating ACE2 enzymatic activity to separate its actions on RAAS from SARS-  
227 CoV-2 neutralization, it has been widely speculated that the dual actions may benefit treatment of COVID-  
228 19. As ACE2 catalyzes the conversion of AngII to Ang-(1-7), therapeutic hrsACE2 or ACE2-Fc will change the  
229 balance from AngII-mediated stimulation of AT1 receptor to AT2 and/or Mas receptor activation, which may  
230 reduce pulmonary dysfunction due to AT1 associated inflammatory responses, lung edema and ARDS[15,  
231 41-44]. Since there is no clinical data on ACE2-derived antiviral therapies, the hypotheses about beneficial  
232 RAAS inhibition are based on observations of COVID-19 patients who are on existing ACEI or ARB  
233 treatments. The general consensus is that these patients should continue RAAS blockade therapies for  
234 treating comorbidities during recovering from viral infection.

235 One of the main benefits of ACE2-Fc fusion construction is its long-acting time as compared to  
236 recombinant ACE2 without the tag[13]. It is expected to provide important assurance of sufficient drug

237 levels to counteract the fluctuating levels of virions in patients, particularly during viremia. Based on clinical  
238 knowledge of Fc-tagged Factor VIII (ELOCTATE®) used in hemophilia A patients, dosing at 3-5 day intervals is  
239 sufficient to maintain a high blood level of the drug (US FDA recommendation).

240 The structural arrangement of ACE2-Fc resembles that of an antibody, with the replacement of antigen-  
241 binding Fab portion of antibody with ACE2 to bind SARS-CoV-2 spike. Meanwhile, the Fc portion can  
242 potentially induce immunological clearance of the virus, which, together in a fusion with ACE2, may be an  
243 effective immunoadhesin[11, 45] to trigger complement activation, antibody-mediated cytotoxicity and  
244 opsonization, and agglutination of targets. With respect to the potential antibody-like benefits of ACE2-Fc,  
245 we compare our overall strategy with existing CD4 immunoadhesin (termed PRO 542) that has existing  
246 clinical data for the treatment of HIV infection[46-50]. PRO 542 (CD4-IgG2/Fc with CD4 targeting HIV gp120)  
247 antiviral is a tetravalent fusion protein using the constant region of IgG2 as opposed to IgG1 of ACE2-Fc. One  
248 notable difference is that IgG2 has extremely low affinity to FcγRs on phagocytic cells, while both IgG1 and  
249 IgG2 can activate complement. With regard to our proof-of-principle study of ACE2-Fc as candidate antiviral  
250 drugs, it is important to point out that in terms of choices of the Fc tag, there are alternative strategies in  
251 recombinant construction. Nevertheless, the inclusion of immunoadhesin potentials of the antiviral may  
252 have caveats. While it may certainly boost immune clearance of the virus, such as through FcγR's selective  
253 binding of clustered Fc, it may also elevate complement and cytokine responses to further aggravate the  
254 inflammation. Although these adverse side effects can be mitigated through modifications of the Fc domain,  
255 the ultimate therapeutic effects in the context of individual patients' conditions can only be determined  
256 through rigorous clinical studies.

257 With regard to drug toxicity, our mouse study of repeated doses of ACE2-Fc in mice had showed the  
258 biologic to be well tolerated for up to two months[13]. However, we cannot extrapolate that its will also be  
259 safe COVID-19 patients. As we consider it is not a simple neutralizing agent of the virus, its bifurcated ACE2  
260 head groups can possibly trigger agglutination of the virus that can potentially aggravate the  
261 hypercoagulable state, making the drug less tolerable in these conditions.

262 From the perspective of recombinant manufacturing, there are challenges ahead for the simple fact that  
263 ACE2-Fc is a large protein (~130 kDa as a monomer and ~260 kDa as a dimer). Furthermore, cocrystal  
264 structures of ACE2 with an inhibitor showed large movements of the two lobes as compared to the Apo  
265 structures[40], suggesting an intrinsic instability of ACE2 protein. Also of note is an earlier study by Lei et al  
266 using double mutations of His374 and His378 of the zinc-binding pocket for neutralization of SARS-CoV-2[6].  
267 However, the ion is important in maintaining protein structure and stability of metallopeptidases[51] [52,

268 53]. This double mutation, as well as our His378Ala and Glu402Ala single mutations of the zinc-binding  
269 pocket may potentially suffer protein instability problems. On the other hand, Arg273Ala mutant that is  
270 predicted to change the substrate pocket will likely have a milder impact on overall protein stability, which is  
271 an important parameter in pharmaceutical production.

272

## 273 **Author statement**

274 **Pan Liu:** Conceptualization, Methodology, Formal analysis, Writing - original draft. **Xinfang Xie:**  
275 Validation, Writing - review & editing. **Li Gao:** Validation, Writing - review & editing. **Jing Jin:**  
276 Conceptualization, Methodology, Project administration, Supervision, Writing - original draft.

## 277 **Acknowledgements**

278 The design of the study was inspired by Dr. Robert Kruse's *F1000Research* article. We thank Drs. Danial  
279 Batlle and Jan Wysocki for their insightful comments.

## 280 **Conflict of interest**

281 Jing Jin and Pan Liu have applied for a provisional patent of the ACE2-Fc mutants described in the article.

282

## 283 **Figure legends**

284 **Figure 1. Mutagenesis strategies for catalytic inactivation of ACE2.** **A.** Schematic representation of  
285 chimeric ACE2-Fc. The ectodomain sequence from amino acid 19 to 740 of human ACE2 is fused to the N-  
286 terminus of Fc domain of human IgG1, which forms a dimer via disulfide bridges (blue lines). The overall plan  
287 was to make individual point mutations (denoted as stars) of the catalytic site to inactivate the ACE2  
288 peptidase activity. **B.** Mutant ACE2-Fc proteins, each carries a single alanine substitution of a selected  
289 residue, were produced by HEK-293 cells. As predicted, the proteins ran above the 250 kDa marker under  
290 nonreducing condition. **C.** The cocrystal structure (PDB: 6M0J) shows SARS-CoV-2 spike RBD binding of ACE2.  
291 ACE2 exists in a clam shell-like configuration holding a catalytic cleft between its proximal and distal lobes. A  
292 zinc ion resides within the proximal lobe of the cleft void. **D.** In an inhibitor (MLN-4760)-bound structure of  
293 ACE2 (PDB: 1R4L), the inhibitor induced a conformational change of the catalytic cleft to adapt a 'closed'  
294 configuration[40]. **E.** Three proximal lobe residues H374, H378 and E402 formed interactions with the zinc  
295 ion. **F.** The side chains of six proximal and distal lobe residues, E145, R273, H345, P346, D368 and H505 (in  
296 green) formed direct interactions with inhibitor MLN-4760 (in magentas).

297 **Figure 2. Substrate-dependent inactivation of ACE2-Fc peptidase among ACE2-Fc mutants.** Three  
298 peptide substrates were tested in catalytic reactions with ten individual variants of ACE2-Fc (wild-type and 9  
299 mutants). The reactions were carried out in two different ways. Left panels: the reactions were performed  
300 using a high amount of purified ACE2-Fc enzyme (100 ng) with varying concentrations of the substrates

301 between 0.39  $\mu\text{M}$  and 200  $\mu\text{M}$  (x-axis). Right panels: a lower dose of 10 ng ACE2-Fc was incubated with a  
302 fixed amount of 2 nmole of Mca-APK(Dnp) or 10 nmole of AngII/Apelin-13. Reactions proceeded for a  
303 standard length of time of 20 min. **A.** Surrogate fluorogenic substrate Mca-AP $\downarrow$ K(Dnp) was tested ( $\downarrow$ :  
304 cleavage site). ACE2-Fc peptidase activities were compared between wild-type and mutants. Seven out of  
305 the nine mutants showed a completely loss-of-activity. **B.** When AngII was used in reactions with the ACE-2-  
306 Fc panel, DRVYIHP $\downarrow$ F of AngII sequence was cleaved by ACE2, releasing a Phe/F. The assay detected the  
307 generation of amino acid Phe/F as the results of ACE2-Fc activity. **C.** Similar to AngII, Apelin-13 was cleaved  
308 by ACE2 between the proline(P)-phenylalanine (F) bond in its sequence, Pyr-RPRLSHKGPMP $\downarrow$ F. The rates of  
309 Phe/F release from the reactions were detected. Data are shown as the mean  $\pm$  SD from triplicate  
310 experiments.

311 **Figure 3. Binding affinities of individual ACE2-Fc variants to RBD of SARS-CoV-2 spike protein. A.** A fixed  
312 amount of recombinant viral RBD protein was coated to an ELISA plate (buffer coated well were used as  
313 controls). Wild-type and nine mutants of ACE2-Fc were added to the wells at varying concentrations  
314 between 0.5 ng/mL and 1200 ng/mL (x-axis). Binding was determined by the difference in signal intensity  
315 between the RBD-coated and the corresponding control wells. **B.** While all variants of ACE2-Fc exhibited  
316 affinity to viral RBD protein, there were differences in their calculated  $\text{EC}_{50}$  values. Data are shown as the  
317 mean  $\pm$  SD from triplicate experiments.

318 **Figure 4. Inhibition of a pseudotyped virus by wild-type ACE2-Fc and  $\Delta$ ACE2-Fc variants. A.** The  
319 transduction activity of a pseudotyped virus expressing SARS-CoV-2 spike protein to HEK293 cells expressing  
320 receptor ACE2 was measured through a firefly luciferase reporter. The cell transduction assays were  
321 performed in the presence of various concentrations of individual ACE2-Fc variants. **B.**  $\text{IC}_{50}$  values were  
322 calculated based on calculated ACE2-Fc concentrations needed to inhibit 50% reporter activity. Data are  
323 shown as the mean  $\pm$  SD from triplicate experiments.

324 **Figure 5. Pharmacokinetics of wild-type ACE2-Fc and  $\Delta$ ACE2-Fc variants. A.** After a bolus *i.v.* injection of  
325 the listed ACE2-Fc variants in mice, drug concentration in blood was monitored over a period time. **B.**  $t_{(1/2)}$   
326 values of individual biologics were calculated by GraphPad Prism software. Data are shown as the mean  $\pm$  SD  
327 (n=3).

328

## 329 References

- 330 [1] R. Yan, Y. Zhang, Y. Li, L. Xia, Y. Guo, Q. Zhou, Structural basis for the recognition of SARS-CoV-2 by  
331 full-length human ACE2, *Science* 367(6485) (2020) 1444-1448.
- 332 [2] D. Wrapp, N. Wang, K.S. Corbett, J.A. Goldsmith, C.L. Hsieh, O. Abiona, B.S. Graham, J.S. McLellan,  
333 Cryo-EM structure of the 2019-nCoV spike in the prefusion conformation, *Science* 367(6483) (2020)  
334 1260-1263.
- 335 [3] P. Zhou, X.L. Yang, X.G. Wang, B. Hu, L. Zhang, W. Zhang, H.R. Si, Y. Zhu, B. Li, C.L. Huang, H.D. Chen,  
336 J. Chen, Y. Luo, H. Guo, R.D. Jiang, M.Q. Liu, Y. Chen, X.R. Shen, X. Wang, X.S. Zheng, K. Zhao, Q.J. Chen,  
337 F. Deng, L.L. Liu, B. Yan, F.X. Zhan, Y.Y. Wang, G.F. Xiao, Z.L. Shi, A pneumonia outbreak associated with a  
338 new coronavirus of probable bat origin, *Nature* 579(7798) (2020) 270-273.
- 339 [4] M. Hoffmann, H. Kleine-Weber, S. Schroeder, N. Kruger, T. Herrler, S. Erichsen, T.S. Schiergens, G.  
340 Herrler, N.H. Wu, A. Nitsche, M.A. Muller, C. Drosten, S. Pohlmann, SARS-CoV-2 Cell Entry Depends on  
341 ACE2 and TMPRSS2 and Is Blocked by a Clinically Proven Protease Inhibitor, *Cell* 181(2) (2020) 271-280  
342 e8.

- 343 [5] V. Monteil, H. Kwon, P. Prado, A. Hagelkruys, R.A. Wimmer, M. Stahl, A. Leopoldi, E. Garreta, C.  
344 Hurtado Del Pozo, F. Prosper, J.P. Romero, G. Wirnsberger, H. Zhang, A.S. Slutsky, R. Conder, N.  
345 Montserrat, A. Mirazimi, J.M. Penninger, Inhibition of SARS-CoV-2 Infections in Engineered Human  
346 Tissues Using Clinical-Grade Soluble Human ACE2, *Cell* 181(4) (2020) 905-913 e7.
- 347 [6] C. Lei, K. Qian, T. Li, S. Zhang, W. Fu, M. Ding, S. Hu, Neutralization of SARS-CoV-2 spike pseudotyped  
348 virus by recombinant ACE2-Ig, *Nat Commun* 11(1) (2020) 2070.
- 349 [7] N. Iwanaga, L. Cooper, L. Rong, B. Beddingfield, J. Crabtree, R.A. Tripp, J.K. Kolls, Novel ACE2-IgG1  
350 fusions with improved activity against SARS-CoV2, *bioRxiv* (2020).
- 351 [8] A. Khan, C. Benthin, B. Zeno, T.E. Albertson, J. Boyd, J.D. Christie, R. Hall, G. Poirier, J.J. Ronco, M.  
352 Tidswell, K. Harges, W.M. Powley, T.J. Wright, S.K. Siederer, D.A. Fairman, D.A. Lipson, A.I. Bayliffe, A.L.  
353 Lazaar, A pilot clinical trial of recombinant human angiotensin-converting enzyme 2 in acute respiratory  
354 distress syndrome, *Crit Care* 21(1) (2017) 234.
- 355 [9] A.R. Hemnes, A. Rathinasabapathy, E.A. Austin, E.L. Brittain, E.J. Carrier, X. Chen, J.P. Fessel, C.D. Fike,  
356 P. Fong, N. Fortune, R.E. Gerszten, J.A. Johnson, M. Kaplowitz, J.H. Newman, R. Piana, M.E. Pugh, T.W.  
357 Rice, I.M. Robbins, L. Wheeler, C. Yu, J.E. Loyd, J. West, A potential therapeutic role for angiotensin-  
358 converting enzyme 2 in human pulmonary arterial hypertension, *Eur Respir J* 51(6) (2018).
- 359 [10] K.K. Chan, D. Dorosky, P. Sharma, S.A. Abbasi, J.M. Dye, D.M. Kranz, A.S. Herbert, E. Procko,  
360 Engineering human ACE2 to optimize binding to the spike protein of SARS coronavirus 2, *Science* (2020).
- 361 [11] R.L. Kruse, Therapeutic strategies in an outbreak scenario to treat the novel coronavirus originating  
362 in Wuhan, China, *F1000Res* 9 (2020) 72.
- 363 [12] X. Miao, Y. Luo, X. Huang, S.M.Y. Lee, Z. Yuan, Y. Tang, L. Chen, C. Wang, F. Wu, Y. Xu, W. Jiang, W.  
364 Gao, X. Song, Y. Yan, T. Pang, C. Chen, Y. Zou, W. Fu, L. Wan, J. Gilbert-Jaramillo, M. Knight, T.K. Tan, P.  
365 Rijal, A. Townsend, J. Sun, X. Liu, W. James, A. Tsun, Y. Xu, A novel biparatopic hybrid antibody-ACE2  
366 fusion that blocks SARS-CoV-2 infection: implications for therapy, *MAbs* 12(1) (2020) 1804241.
- 367 [13] P. Liu, J. Wysocki, T. Souma, M. Ye, V. Ramirez, B. Zhou, L.D. Wilsbacher, S.E. Quaggin, D. Batlle, J.  
368 Jin, Novel ACE2-Fc chimeric fusion provides long-lasting hypertension control and organ protection in  
369 mouse models of systemic renin angiotensin system activation, *Kidney Int* 94(1) (2018) 114-125.
- 370 [14] Y. Imai, K. Kuba, S. Rao, Y. Huan, F. Guo, B. Guan, P. Yang, R. Sarao, T. Wada, H. Leong-Poi, M.A.  
371 Crackower, A. Fukamizu, C.C. Hui, L. Hein, S. Uhlig, A.S. Slutsky, C. Jiang, J.M. Penninger, Angiotensin-  
372 converting enzyme 2 protects from severe acute lung failure, *Nature* 436(7047) (2005) 112-6.
- 373 [15] G.P. Rossi, V. Sanga, M. Barton, Potential harmful effects of discontinuing ACE-inhibitors and ARBs  
374 in COVID-19 patients, *Elife* 9 (2020).
- 375 [16] T.J. Guzik, S.A. Mohiddin, A. Dimarco, V. Patel, K. Savvatis, F.M. Marelli-Berg, M.S. Madhur, M.  
376 Tomaszewski, P. Maffia, F. D'Acquisto, S.A. Nicklin, A.J. Marian, R. Nosalski, E.C. Murray, B. Guzik, C.  
377 Berry, R.M. Touyz, R. Kreutz, D.W. Wang, D. Bhella, O. Sagliocco, F. Crea, E.C. Thomson, I.B. McInnes,  
378 COVID-19 and the cardiovascular system: implications for risk assessment, diagnosis, and treatment  
379 options, *Cardiovasc Res* (2020).
- 380 [17] E.R. Lumbers, S.J. Delforce, K.G. Pringle, G.R. Smith, The Lung, the Heart, the Novel Coronavirus, and  
381 the Renin-Angiotensin System; The Need for Clinical Trials, *Front Med (Lausanne)* 7 (2020) 248.
- 382 [18] A. Cai, B. McClafferty, J. Benson, D. Ramgobin, R. Kalayanamitra, Z. Shahid, A. Groff, C.S. Aggarwal,  
383 R. Patel, H. Polimera, R. Vunnam, R. Golamari, N. Sahu, D. Bhatt, R. Jain, COVID-19: Catastrophic Cause  
384 of Acute Lung Injury, *S D Med* 73(6) (2020) 252-260.
- 385 [19] Y.Y. Zheng, Y.T. Ma, J.Y. Zhang, X. Xie, COVID-19 and the cardiovascular system, *Nat Rev Cardiol*  
386 17(5) (2020) 259-260.
- 387 [20] A.H.J. Danser, M. Epstein, D. Batlle, Renin-Angiotensin System Blockers and the COVID-19  
388 Pandemic: At Present There Is No Evidence to Abandon Renin-Angiotensin System Blockers,  
389 *Hypertension* 75(6) (2020) 1382-1385.

- 390 [21] M.A. Sparks, A. South, P. Welling, J.M. Luther, J. Cohen, J.B. Byrd, L.M. Burrell, D. Batlle, L.  
391 Tomlinson, V. Bhalla, M.N. Rheault, M.J. Soler, S. Swaminathan, S. Hiremath, Sound Science before Quick  
392 Judgement Regarding RAS Blockade in COVID-19, *Clin J Am Soc Nephrol* 15(5) (2020) 714-716.
- 393 [22] C. Bavishi, T.M. Maddox, F.H. Messerli, Coronavirus Disease 2019 (COVID-19) Infection and Renin  
394 Angiotensin System Blockers, *JAMA Cardiol* (2020).
- 395 [23] M. Vaduganathan, O. Vardeny, T. Michel, J.J.V. McMurray, M.A. Pfeffer, S.D. Solomon, Renin-  
396 Angiotensin-Aldosterone System Inhibitors in Patients with Covid-19, *N Engl J Med* 382(17) (2020) 1653-  
397 1659.
- 398 [24] A.M. South, T.M. Brady, J.T. Flynn, ACE2 (Angiotensin-Converting Enzyme 2), COVID-19, and ACE  
399 Inhibitor and Ang II (Angiotensin II) Receptor Blocker Use During the Pandemic: The Pediatric  
400 Perspective, *Hypertension* 76(1) (2020) 16-22.
- 401 [25] M.R. Mehra, S.S. Desai, S. Kuy, T.D. Henry, A.N. Patel, Cardiovascular Disease, Drug Therapy, and  
402 Mortality in Covid-19, *N Engl J Med* 382(25) (2020) e102.
- 403 [26] A.M. South, D.I. Diz, M.C. Chappell, COVID-19, ACE2, and the cardiovascular consequences, *Am J*  
404 *Physiol Heart Circ Physiol* 318(5) (2020) H1084-H1090.
- 405 [27] R. Sommerstein, M.M. Kochen, F.H. Messerli, C. Grani, Coronavirus Disease 2019 (COVID-19): Do  
406 Angiotensin-Converting Enzyme Inhibitors/Angiotensin Receptor Blockers Have a Biphasic Effect?, *J Am*  
407 *Heart Assoc* 9(7) (2020) e016509.
- 408 [28] F. Zhou, T. Yu, R. Du, G. Fan, Y. Liu, Z. Liu, J. Xiang, Y. Wang, B. Song, X. Gu, L. Guan, Y. Wei, H. Li, X.  
409 Wu, J. Xu, S. Tu, Y. Zhang, H. Chen, B. Cao, Clinical course and risk factors for mortality of adult inpatients  
410 with COVID-19 in Wuhan, China: a retrospective cohort study, *Lancet* 395(10229) (2020) 1054-1062.
- 411 [29] J. Guo, Z. Huang, L. Lin, J. Lv, Coronavirus Disease 2019 (COVID-19) and Cardiovascular Disease: A  
412 Viewpoint on the Potential Influence of Angiotensin-Converting Enzyme Inhibitors/Angiotensin Receptor  
413 Blockers on Onset and Severity of Severe Acute Respiratory Syndrome Coronavirus 2 Infection, *J Am*  
414 *Heart Assoc* 9(7) (2020) e016219.
- 415 [30] M. Noris, A. Benigni, G. Remuzzi, The case of complement activation in COVID-19 multiorgan  
416 impact, *Kidney Int* (2020).
- 417 [31] K. Renu, P.L. Prasanna, A. Valsala Gopalakrishnan, Coronaviruses pathogenesis, comorbidities and  
418 multi-organ damage - A review, *Life Sci* 255 (2020) 117839.
- 419 [32] S. Zaim, J.H. Chong, V. Sankaranarayanan, A. Harky, COVID-19 and Multiorgan Response, *Curr Probl*  
420 *Cardiol* 45(8) (2020) 100618.
- 421 [33] H. Bosmuller, S. Traxler, M. Bitzer, H. Haberle, W. Raiser, D. Nann, L. Frauenfeld, A. Vogelsberg, K.  
422 Klingel, F. Fend, The evolution of pulmonary pathology in fatal COVID-19 disease: an autopsy study with  
423 clinical correlation, *Virchows Arch* (2020).
- 424 [34] T. Menter, J.D. Haslbauer, R. Nienhold, S. Savic, H. Hopfer, N. Deigendesch, S. Frank, D. Turek, N.  
425 Willi, H. Pargger, S. Bassetti, J.D. Leuppi, G. Cathomas, M. Tolnay, K.D. Mertz, A. Tzankov, Post-mortem  
426 examination of COVID19 patients reveals diffuse alveolar damage with severe capillary congestion and  
427 variegated findings of lungs and other organs suggesting vascular dysfunction, *Histopathology* (2020).
- 428 [35] P. Liu, J. Wysocki, P. Serfozo, M. Ye, T. Souma, D. Batlle, J. Jin, A Fluorometric Method of Measuring  
429 Carboxypeptidase Activities for Angiotensin II and Apelin-13, *Sci Rep* 7 (2017) 45473.
- 430 [36] A.C. Walls, Y.J. Park, M.A. Tortorici, A. Wall, A.T. McGuire, D. Veessler, Structure, Function, and  
431 Antigenicity of the SARS-CoV-2 Spike Glycoprotein, *Cell* 181(2) (2020) 281-292 e6.
- 432 [37] J. Shang, G. Ye, K. Shi, Y. Wan, C. Luo, H. Aihara, Q. Geng, A. Auerbach, F. Li, Structural basis of  
433 receptor recognition by SARS-CoV-2, *Nature* 581(7807) (2020) 221-224.
- 434 [38] J. Lan, J. Ge, J. Yu, S. Shan, H. Zhou, S. Fan, Q. Zhang, X. Shi, Q. Wang, L. Zhang, X. Wang, Structure of  
435 the SARS-CoV-2 spike receptor-binding domain bound to the ACE2 receptor, *Nature* 581(7807) (2020)  
436 215-220.

- 437 [39] Q. Wang, Y. Zhang, L. Wu, S. Niu, C. Song, Z. Zhang, G. Lu, C. Qiao, Y. Hu, K.Y. Yuen, Q. Wang, H.  
438 Zhou, J. Yan, J. Qi, Structural and Functional Basis of SARS-CoV-2 Entry by Using Human ACE2, *Cell* 181(4)  
439 (2020) 894-904 e9.
- 440 [40] P. Towler, B. Staker, S.G. Prasad, S. Menon, J. Tang, T. Parsons, D. Ryan, M. Fisher, D. Williams, N.A.  
441 Dales, M.A. Patane, M.W. Pantoliano, ACE2 X-ray structures reveal a large hinge-bending motion  
442 important for inhibitor binding and catalysis, *J Biol Chem* 279(17) (2004) 17996-8007.
- 443 [41] P. Namsolleck, G.N. Moll, Does activation of the protective Renin-Angiotensin System have  
444 therapeutic potential in COVID-19?, *Mol Med* 26(1) (2020) 80.
- 445 [42] M.K. Chung, S. Karnik, J. Saef, C. Bergmann, J. Barnard, M.M. Lederman, J. Tilton, F. Cheng, C.V.  
446 Harding, J.B. Young, N. Mehta, S.J. Cameron, K.R. McCrae, A.H. Schmaier, J.D. Smith, A. Kalra, S.K.  
447 Gebreselassie, G. Thomas, E.S. Hawkins, L.G. Svensson, SARS-CoV-2 and ACE2: The biology and clinical  
448 data settling the ARB and ACEI controversy, *EBioMedicine* 58 (2020) 102907.
- 449 [43] R. Sarzani, F. Giulietti, C. Di Pentima, P. Giordano, F. Spannella, Disequilibrium between the classic  
450 renin-angiotensin system and its opposing arm in SARS-CoV-2-related lung injury, *Am J Physiol Lung Cell*  
451 *Mol Physiol* 319(2) (2020) L325-L336.
- 452 [44] R.D. Lopes, A.V.S. Macedo, E.S.P.G.M. de Barros, R.J. Moll-Bernardes, A. Feldman, G. D'Andrea Saba  
453 Arruda, A.S. de Souza, D.C. de Albuquerque, L. Mazza, M.F. Santos, N.Z. Salvador, C.M. Gibson, C.B.  
454 Granger, J.H. Alexander, O.F. de Souza, B.C. investigators, Continuing versus suspending angiotensin-  
455 converting enzyme inhibitors and angiotensin receptor blockers: Impact on adverse outcomes in  
456 hospitalized patients with severe acute respiratory syndrome coronavirus 2 (SARS-CoV-2)--The BRACE  
457 CORONA Trial, *Am Heart J* 226 (2020) 49-59.
- 458 [45] A. Ashkenazi, S.M. Chamow, Immunoadhesins as research tools and therapeutic agents, *Curr Opin*  
459 *Immunol* 9(2) (1997) 195-200.
- 460 [46] S.M. Chamow, A.M. Duliege, A. Ammann, J.O. Kahn, J.D. Allen, J.W. Eichberg, R.A. Byrn, D.J. Capon,  
461 R.H. Ward, A. Ashkenazi, CD4 immunoadhesins in anti-HIV therapy: new developments, *Int J Cancer*  
462 *Suppl* 7 (1992) 69-72.
- 463 [47] C.V. Fletcher, J.G. DeVille, P.M. Samson, J.H. Moye, Jr., J.A. Church, H.M. Spiegel, P. Palumbo, T.  
464 Fenton, M.E. Smith, B. Graham, J.M. Kraimer, W.T. Shearer, P.S.G. Pediatric Aids Clinical Trials Group,  
465 Nonlinear pharmacokinetics of high-dose recombinant fusion protein CD4-IgG2 (PRO 542) observed in  
466 HIV-1-infected children, *J Allergy Clin Immunol* 119(3) (2007) 747-50.
- 467 [48] J.M. Jacobson, R.J. Israel, I. Lowy, N.A. Ostrow, L.S. Vassilatos, M. Barish, D.N. Tran, B.M. Sullivan,  
468 T.J. Ketas, T.J. O'Neill, K.A. Nagashima, W. Huang, C.J. Petropoulos, J.P. Moore, P.J. Maddon, W.C. Olson,  
469 Treatment of advanced human immunodeficiency virus type 1 disease with the viral entry inhibitor PRO  
470 542, *Antimicrob Agents Chemother* 48(2) (2004) 423-9.
- 471 [49] J.M. Jacobson, I. Lowy, C.V. Fletcher, T.J. O'Neill, D.N. Tran, T.J. Ketas, A. Trkola, M.E. Klotman, P.J.  
472 Maddon, W.C. Olson, R.J. Israel, Single-dose safety, pharmacology, and antiviral activity of the human  
473 immunodeficiency virus (HIV) type 1 entry inhibitor PRO 542 in HIV-infected adults, *J Infect Dis* 182(1)  
474 (2000) 326-9.
- 475 [50] W.T. Shearer, R.J. Israel, S. Starr, C.V. Fletcher, D. Wara, M. Rathore, J. Church, J. DeVille, T. Fenton,  
476 B. Graham, P. Samson, S. Staprans, J. McNamara, J. Moye, P.J. Maddon, W.C. Olson, Recombinant CD4-  
477 IgG2 in human immunodeficiency virus type 1-infected children: phase 1/2 study. The Pediatric AIDS  
478 Clinical Trials Group Protocol 351 Study Team, *J Infect Dis* 182(6) (2000) 1774-9.
- 479 [51] S. Fridrich, K. Karmilin, W. Stocker, Handling Metalloproteinases, *Curr Protoc Protein Sci* 83 (2016)  
480 21.16.1-21.16.20.
- 481 [52] F. Namuswe, J.M. Berg, Secondary interactions involving zinc-bound ligands: roles in structural  
482 stabilization and macromolecular interactions, *J Inorg Biochem* 111 (2012) 146-9.
- 483 [53] K.A. McCall, C. Huang, C.A. Fierke, Function and mechanism of zinc metalloenzymes, *J Nutr* 130(5S  
484 Suppl) (2000) 1437S-46S.

485

486



487 **Supplementary figures**

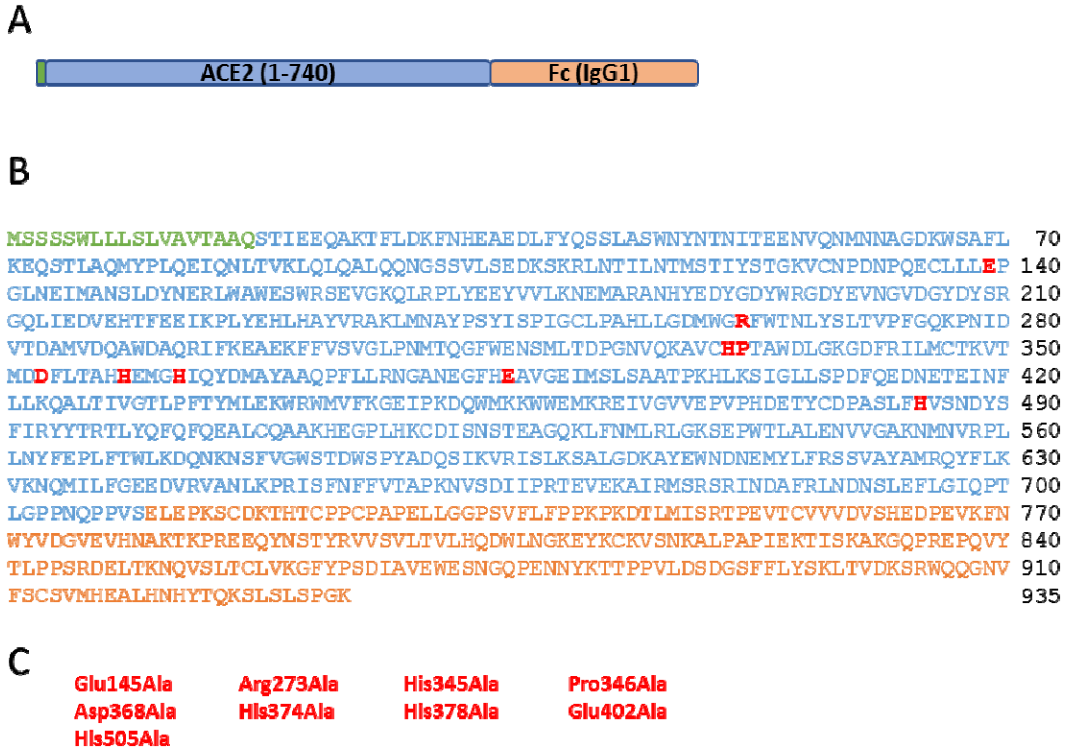

488

489

490 **Supplementary Figure S1. Summary of ACE2-Fc mutagenesis. A.** Schematics of ACE2-Fc fusion construct:

491 in an N-to-C-terminus order, ACE2-Fc is comprised of signal peptide and ACE2 ectodomain of human

492 sequence, followed by Fc derived from human IgG1. **B.** The amino acid sequence of wild-type ACE2-Fc,

493 showing signal peptide, ACE2 ectodomain and Fc with distinct font colors. The single amino acids in red

494 fonts were individually mutated to alanine. **C.** List of the 9 mutants of ACE2-Fc.

495

496

497

498

499

500

501

502

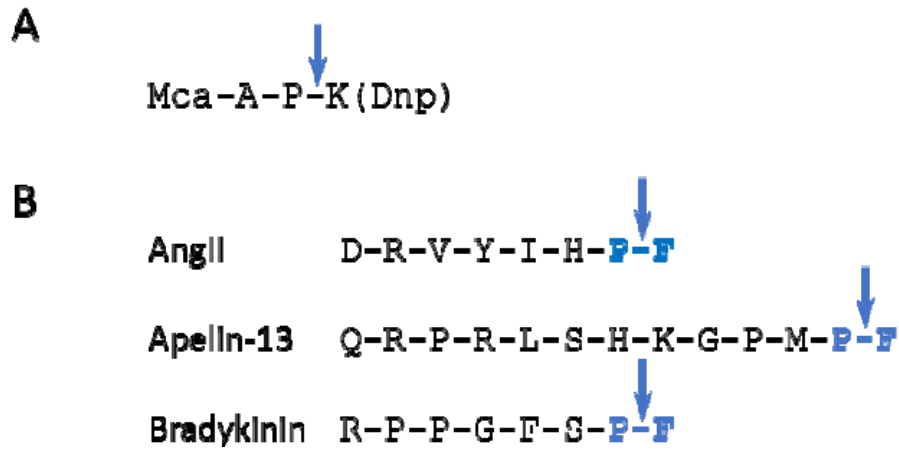

503

504

505 **Supplementary Figure S2. The consensus substrate motif of ACE2 . A.** ACE2 cleaves surrogate peptide of  
506 Mca-APK-(Dnp) between proline (P) and lysine (K) residues (arrow). **B.** ACE2 cleaves proline-phenylalanine  
507 (P-F) peptide bonds at the C-termini of its physiological peptides.

**A**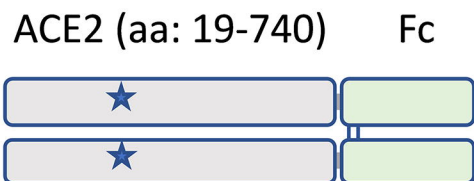**B**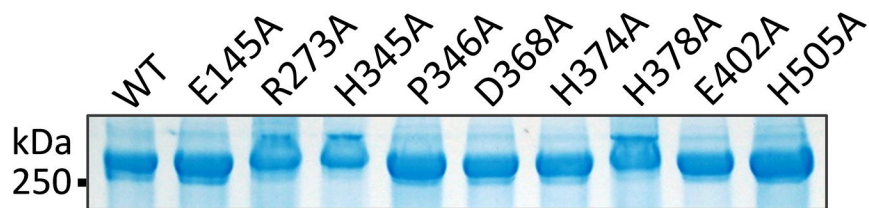**C**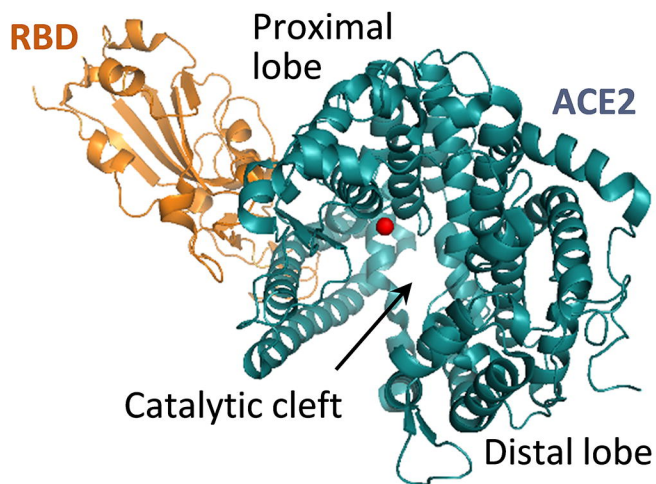**D**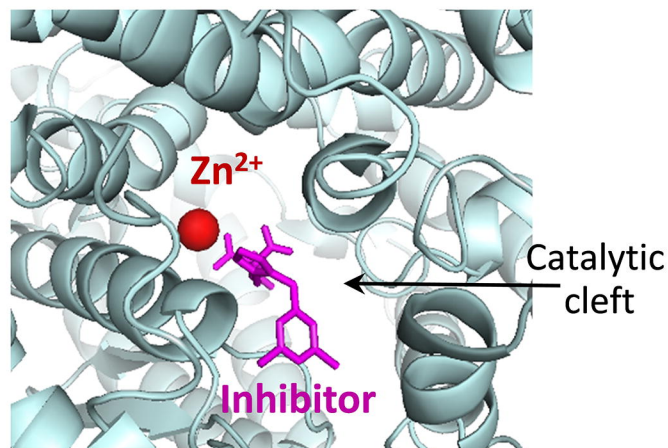**E**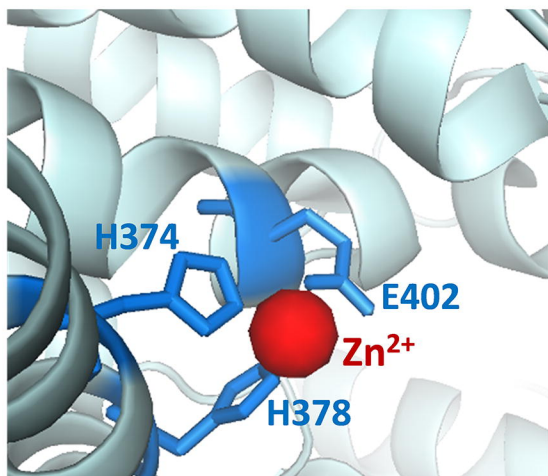**F**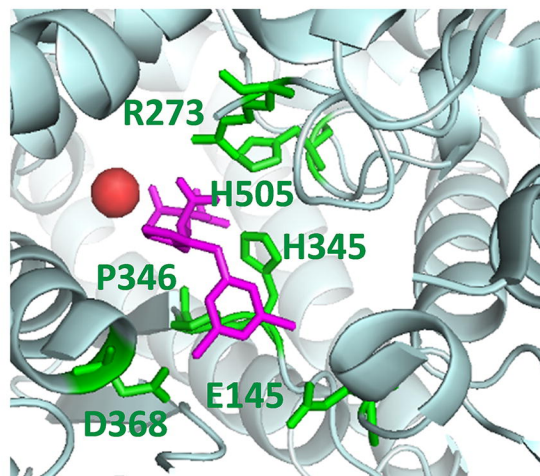

A

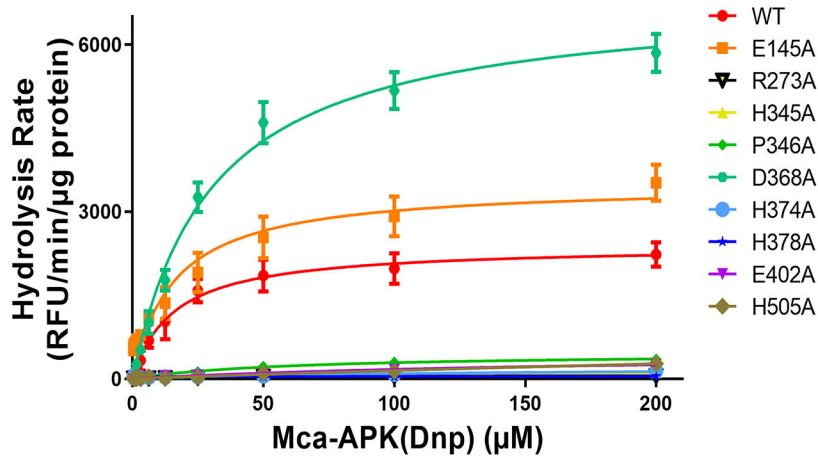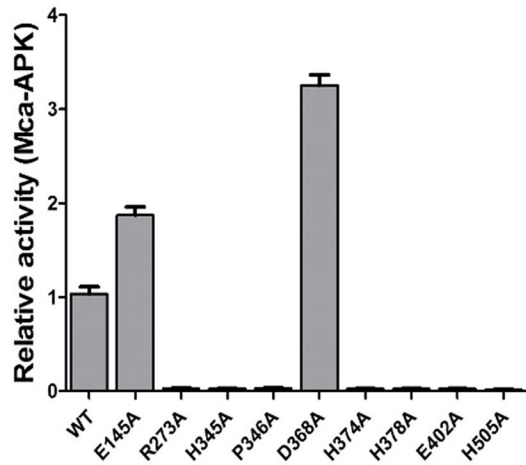

B

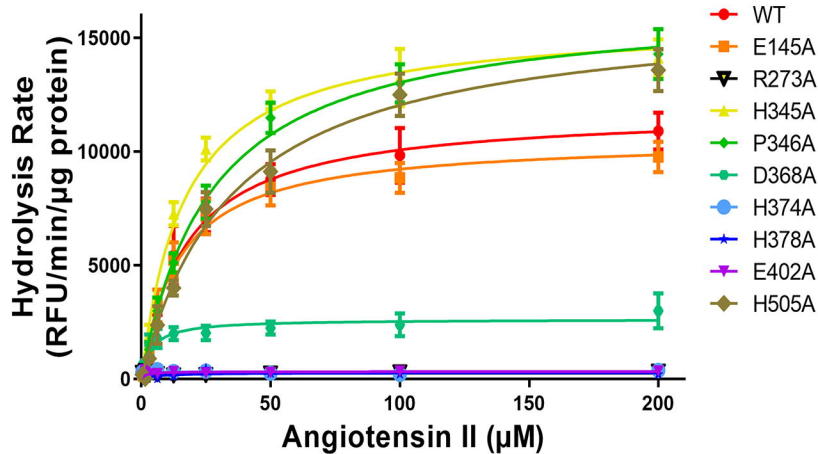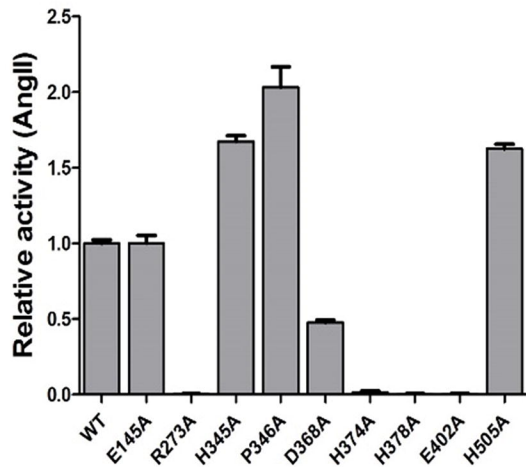

C

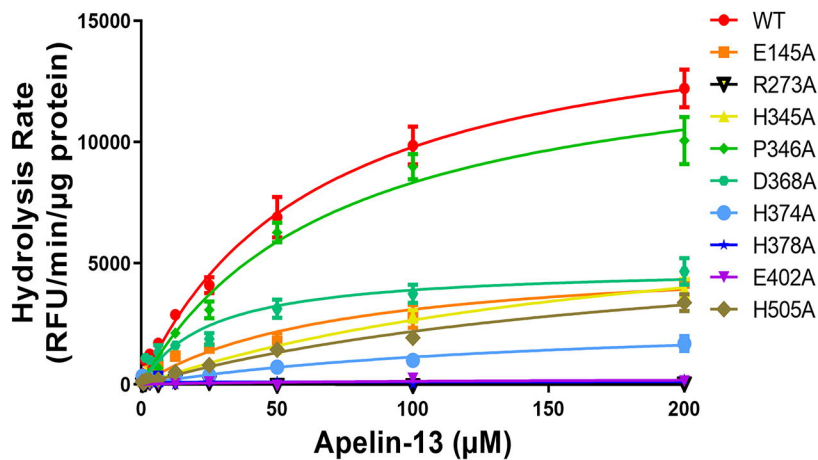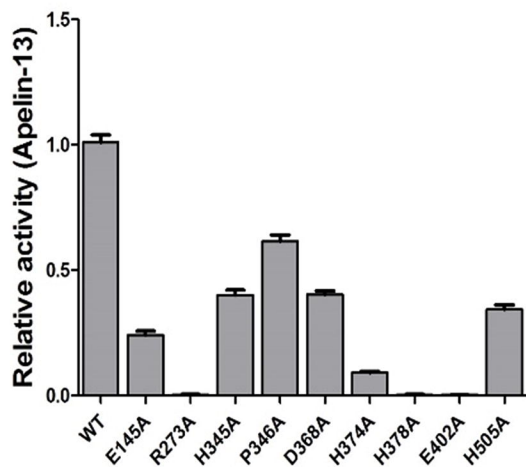

A

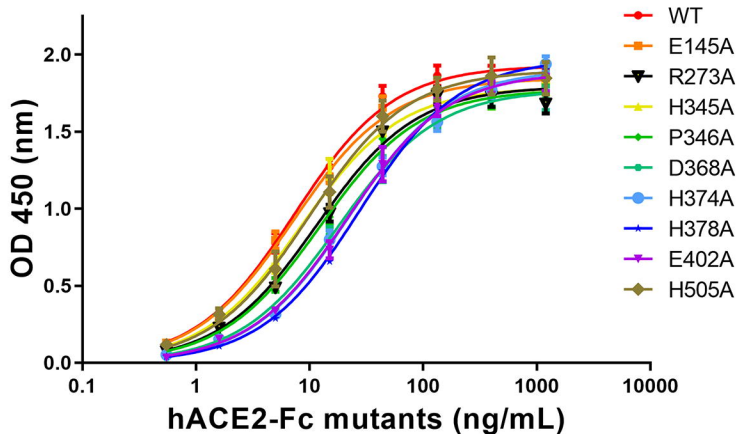

B

| ACE2-Fc | EC <sub>50</sub><br>(ng/mL) | ACE2-Fc | EC <sub>50</sub><br>(ng/mL) |
|---------|-----------------------------|---------|-----------------------------|
| WT      | 7.3                         | D368A   | 16.7                        |
| E145A   | 7.2                         | H374A   | 23.1                        |
| R273A   | 12.6                        | H378A   | 26.9                        |
| H345A   | 8.2                         | E402A   | 21.8                        |
| P346A   | 11.9                        | H505A   | 11.3                        |

A

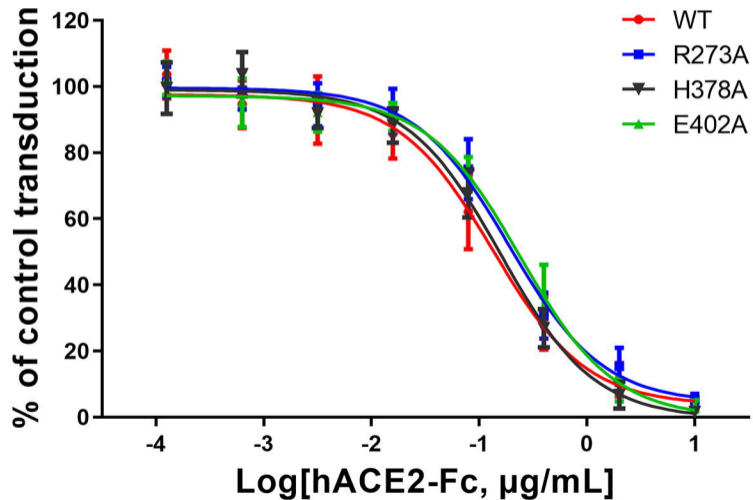

B

| ACE2-Fc | IC <sub>50</sub> (µg/mL) |
|---------|--------------------------|
| WT      | 0.13                     |
| R273A   | 0.19                     |
| H378A   | 0.16                     |
| E402A   | 0.24                     |

A

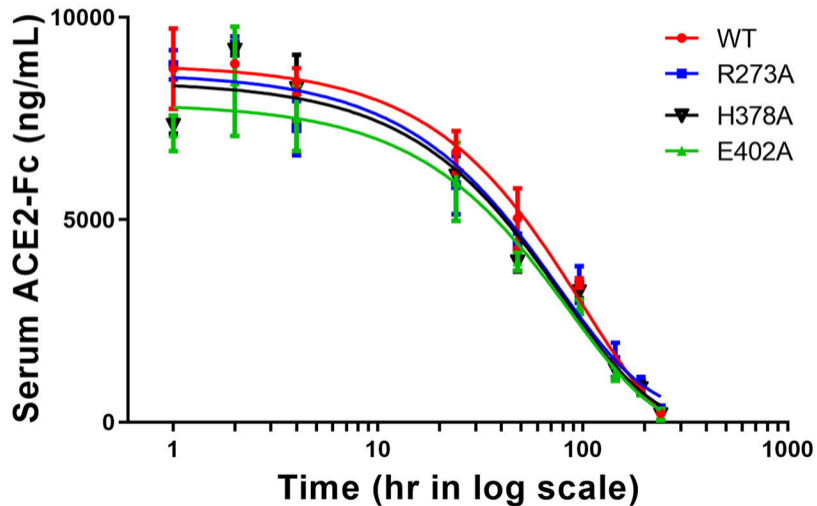

B

| ACE2-Fc | $t_{(1/2)}$ (h) |
|---------|-----------------|
| WT      | 69.88           |
| R273A   | 52.61           |
| H378A   | 55.39           |
| E402A   | 59.49           |
